# Supplementary material
Source: Springer Nature journal article supplement (https://www.springermedizin.de/resource/supplementary/12885_2001_10_MOESM2_ESM.pdf/9460004)

## LoVo

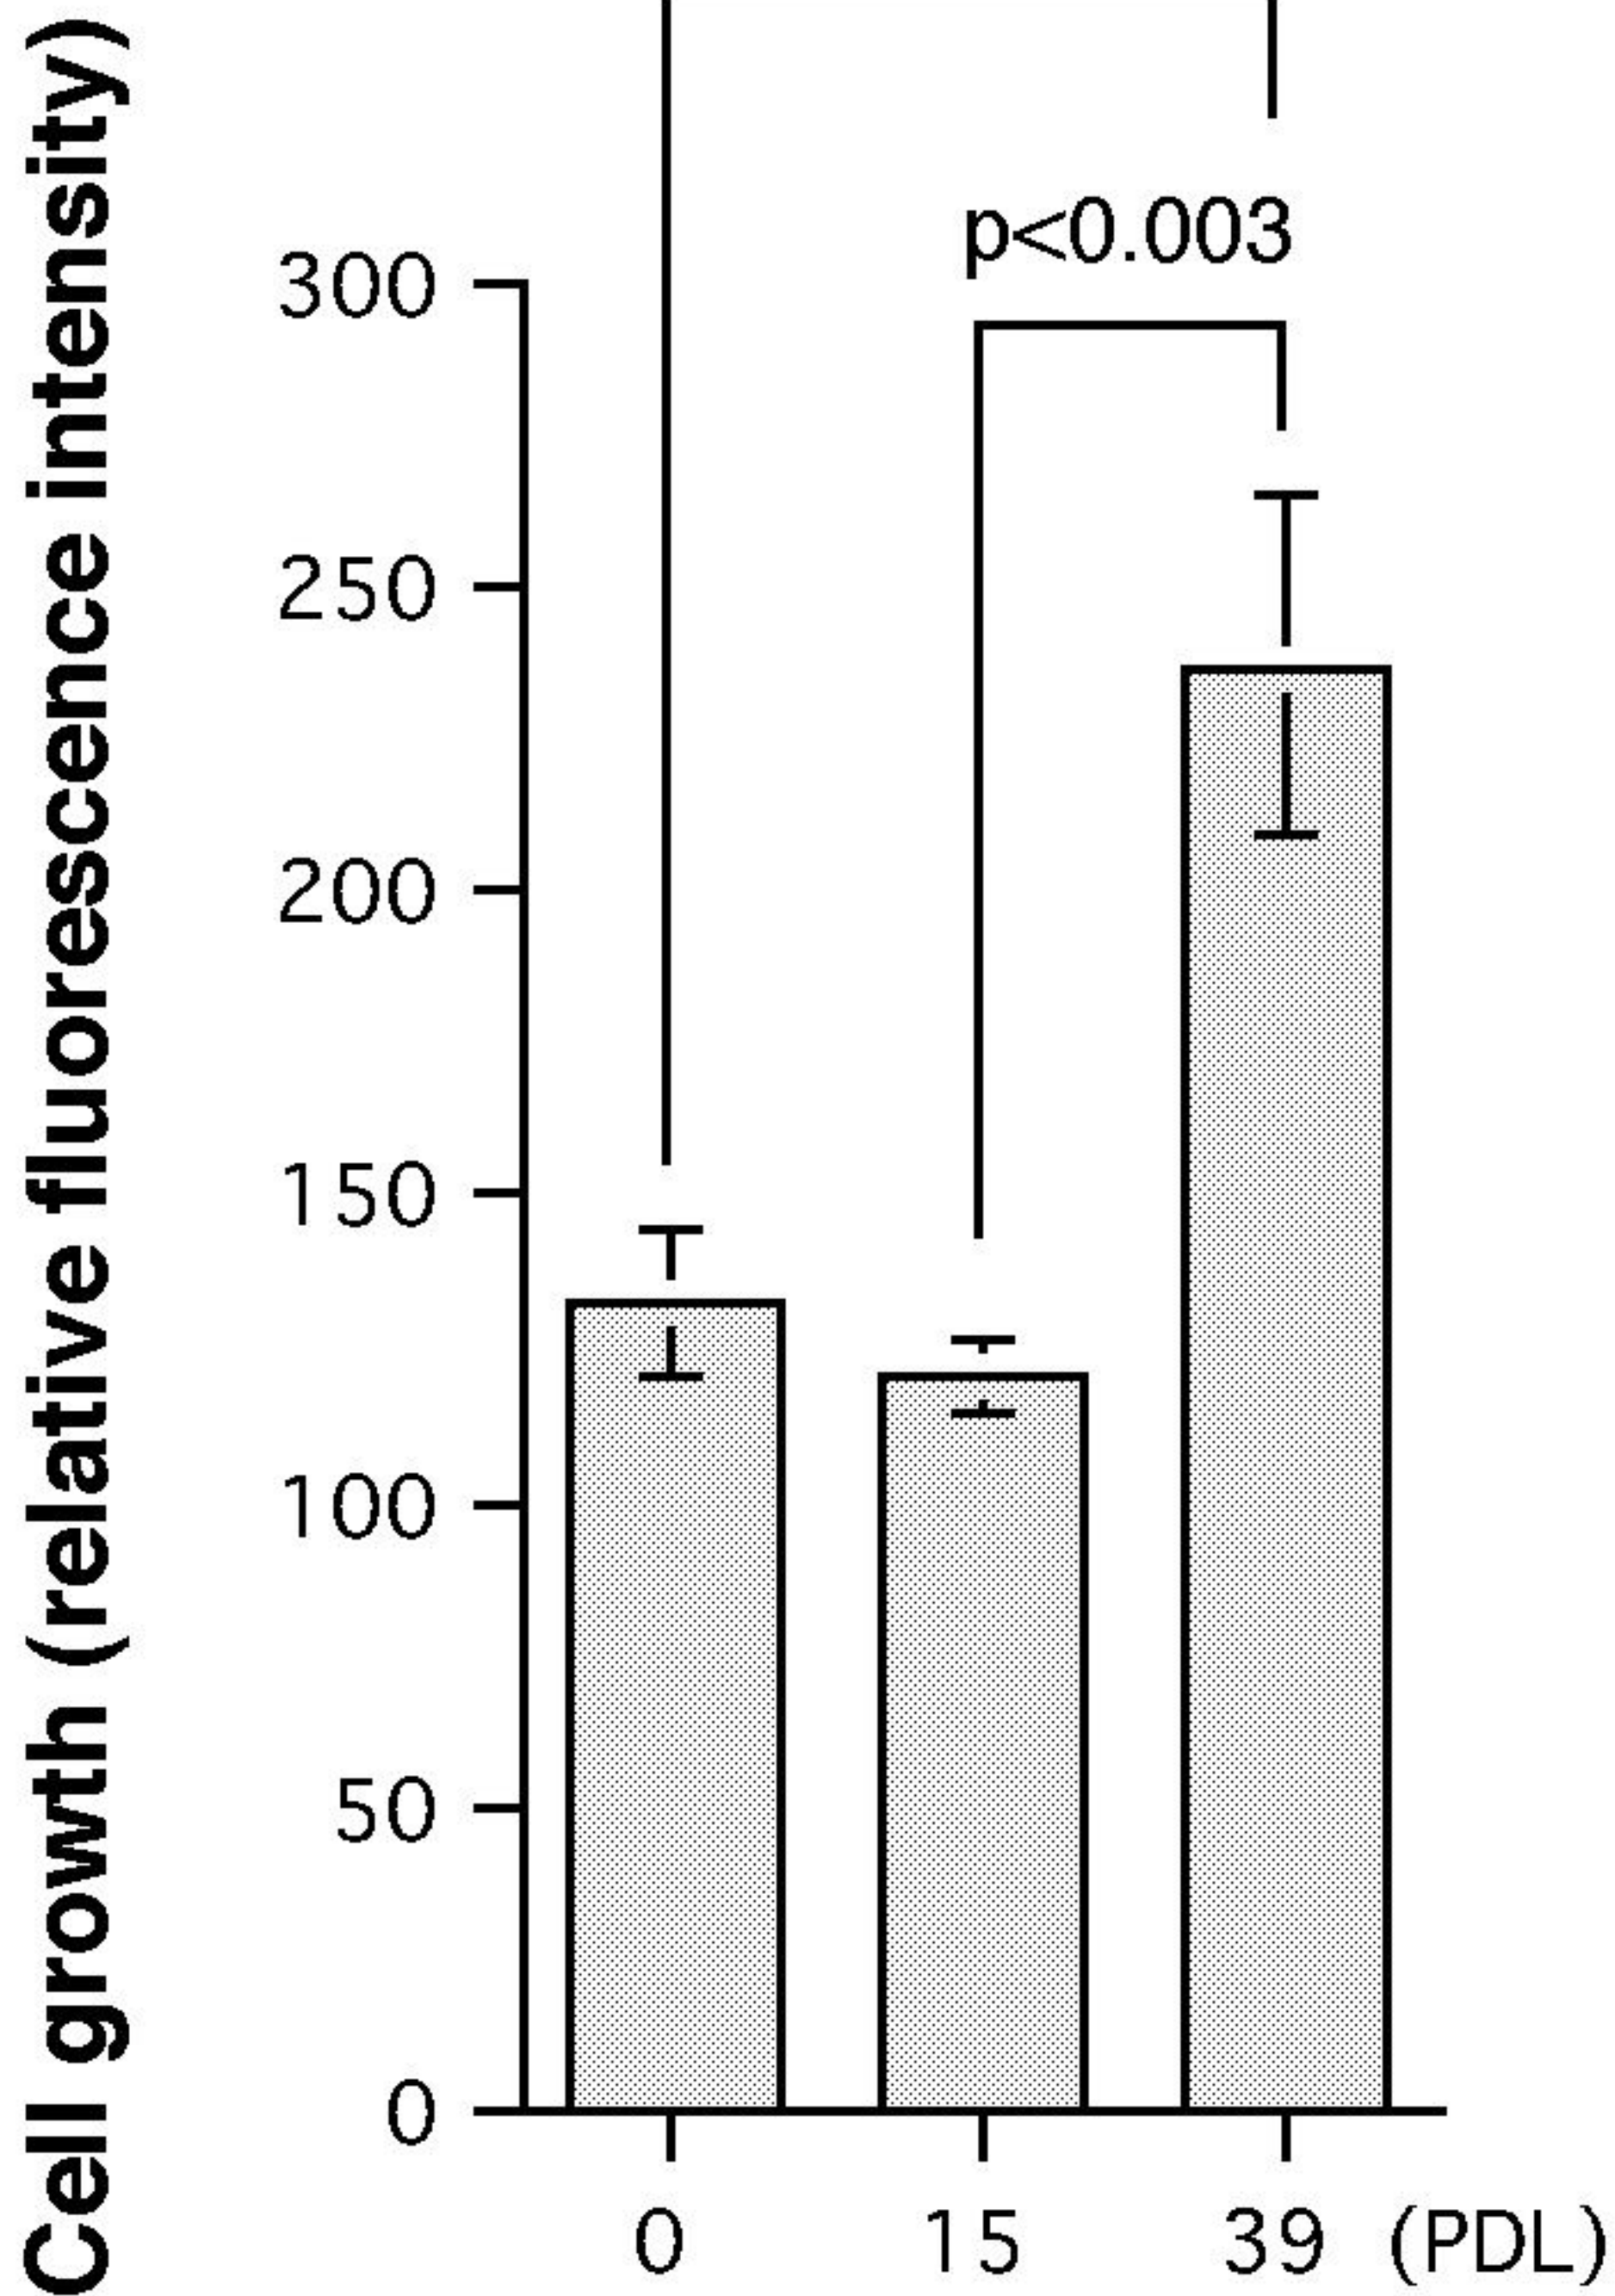

## DLD-1

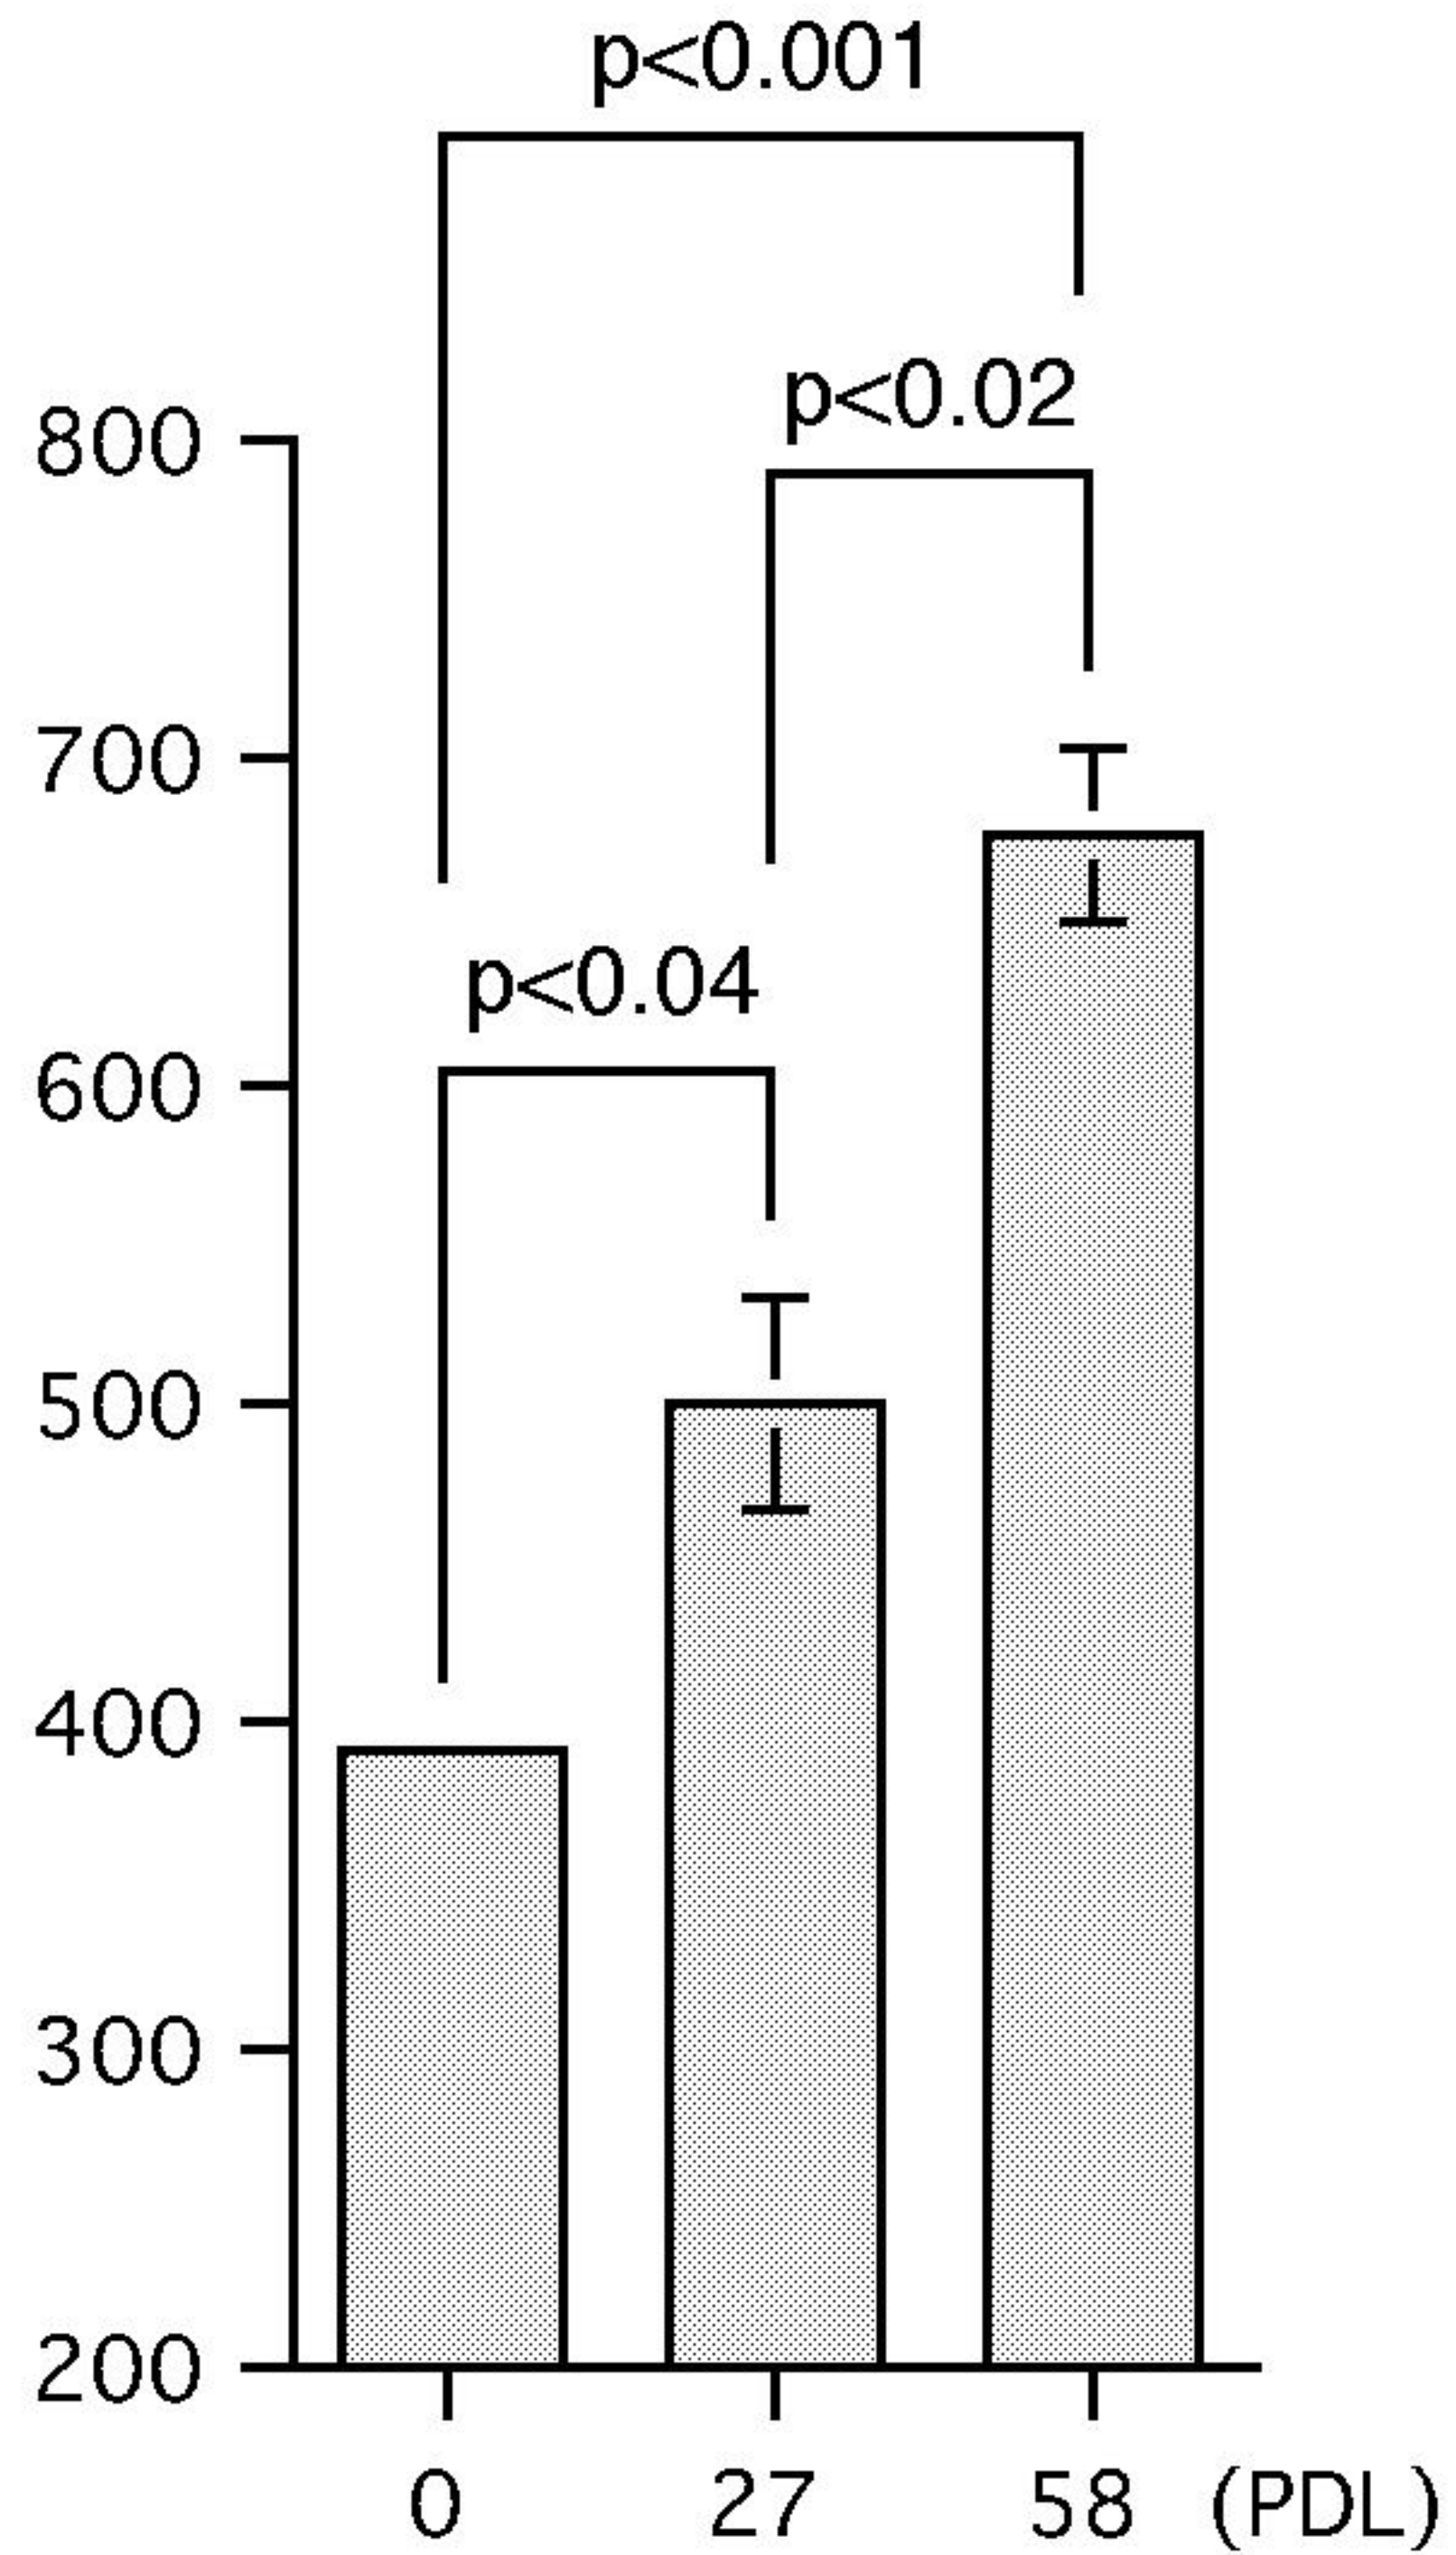

Supplement: MOESM2 [file 9460004]
